# Supplementary material for: Long-Term Giant Hogweed Invasion Contributes to the Structural Changes of Soil Nematofauna
Source: MDPI journal article supplement (doi:10.3390/plants10102103), 2021-10-04
Supplement: s1 [file s1]

**Table S1** Factorial analysis of variance. Effect of three factors (season, year and invasion status) on the physico-chemical soil parameters

| Factors        | Degrees of freedom | Sum of squares | Mean squares | F values  | Significant |
|----------------|--------------------|----------------|--------------|-----------|-------------|
| Factor A (C)   | 2                  | 0.009          | 0.005        | 6.9201    | **          |
| Factor B       | 1                  | 0.001          | 0.001        | 1.4628    | -           |
| Factor C       | 1                  | 0.007          | 0.004        | 10.5180   | **          |
| A x B          | 2                  | 0.000          | 0.000        | 0.2059    | -           |
| A x C          | 2                  | 0.019          | 0.009        | 14.2652   | **          |
| B x C          | 1                  | 0.000          | 0.000        | 0.4259    | -           |
| A x B x C      | 2                  | 0.000          | 0.000        | 0.3676    | -           |
| Factor A (N)   | 2                  | 0.883          | 0.441        | 4.9203    | *           |
| Factor B       | 1                  | 0.023          | 0.023        | 0.2531    | -           |
| Factor C       | 1                  | 0.706          | 0.706        | 7.8731    | **          |
| A x B          | 2                  | 0.028          | 0.017        | 0.1535    | -           |
| A x C          | 2                  | 0.484          | 0.242        | 2.6981    | *           |
| B x C          | 1                  | 0.024          | 0.024        | 0.2645    | -           |
| A x B x C      | 2                  | 0.028          | 0.014        | 0.1549    | -           |
| Factor A (C/N) | 2                  | 39.369         | 19.384       | 33.6590   | **          |
| Factor B       | 1                  | 0.003          | 0.003        | 0.0049    | -           |
| Factor C       | 1                  | 3.752          | 3.752        | 6.4157    | *           |
| A x B          | 2                  | 0.000          | 0.000        | 0.003     | -           |
| A x C          | 2                  | 19.359         | 9.679        | 16.5510   | **          |
| B x C          | 1                  | 0.001          | 0.001        | 0.0009    | -           |
| A x B x C      | 2                  | 0.002          | 0.001        | 0.0013    | -           |
| Factor A (pH)  | 2                  | 1.086          | 0.543        | 274.700   | **          |
| Factor B       | 1                  | 0.000          | 0.000        | 0.2053    | -           |
| Factor C       | 1                  | 11.530         | 11.530       | 5835.57   | **          |
| A x B          | 2                  | 0.000          | 0.000        | 0.1212    | -           |
| A x C          | 2                  | 0.274          | 0.137        | 69.2934   | **          |
| B x C          | 1                  | 0.001          | 0.001        | 0.7094    | -           |
| A x B x C      | 2                  | 0.001          | 0.000        | 0.2492    | -           |
| Factor A (SM)  | 2                  | 1476.941       | 738.470      | 1736.8896 | **          |
| Factor B       | 1                  | 0.000          | 0.000        | 0.0011    | -           |
| Factor C       | 1                  | 14.910         | 14.910       | 35.0688   | **          |
| A x B          | 2                  | 0.013          | 0.007        | 0.0154    | -           |
| A x C          | 2                  | 38.666         | 19.333       | 45.4716   | **          |
| B x C          | 1                  | 0.439          | 0.439        | 1.0316    | -           |
| A x B x C      | 2                  | 0.656          | 0.328        | 0.7716    | -           |

Factor A (year); Factor B (season); Factor C (invasion status) \*\* F values significant at  $P < 0.01$ ; \* F values significant at  $P < 0.05$ . SM, soil moisture (% of initial weight); pH (H<sub>2</sub>O), soil acidity; N, soil nitrogen content (% of dry weight); C, soil carbon content (% of dry weight); C:N, ratio of carbon to nitrogen

**Table S2.** Spearman's rank correlation between nematode abundance, species number, nematode trophic groups, ecological indices and soil properties

|                         | SM      | pH (KCl)  | N         | C        | C/N |
|-------------------------|---------|-----------|-----------|----------|-----|
| Nematode abundance      | ns      | -0.3951** | ns        | ns       | ns  |
| Nematode species number | ns      | -0.2692*  | ns        | ns       | ns  |
| Bacterivores            | ns      | ns        | ns        | ns       | ns  |
| Fungivores              | ns      | ns        | 0.2863*   | ns       | ns  |
| Omnivores               | 0.2514* | ns        | ns        | 0.3438** | ns  |
| Predators               | ns      | ns        | ns        | ns       | ns  |
| Plant Parasites         | 0.3169* | -0.2887*  | ns        | ns       | ns  |
| Root-fungal feeders     | ns      | -0.4426** | ns        | ns       | ns  |
| Species diversity index | ns      | ns        | ns        | ns       | ns  |
| Maturity index          | ns      | ns        | -0.2479*  | 0.3554*  | ns  |
| Maturity index (2-5)    | ns      | ns        | ns        | ns       | ns  |
| Sum Maturity index      | ns      | ns        | -0.3127** | ns       | ns  |
| Plant parasite index    | ns      | -0.526*** | ns        | ns       | ns  |
| Enrichment index        | ns      | ns        | ns        | ns       | ns  |
| Structure index         | ns      | ns        | ns        | ns       | ns  |
| Channel index           | ns      | ns        | ns        | ns       | ns  |
| Total nematode biomass  | ns      | -0.2556*  | 0.4598**  | 0.2642*  | ns  |

SM. soil moisture (% of initial weight); pH (KCl). soil acidity; N. soil nitrogen content (% of dry weight); C. soil carbon content (% of dry weight); C:N. ratio of carbon to nitrogen. \* =  $P < 0.05$ ;

\*\* =  $P < 0.01$ ; \*\*\* =  $P < 0.001$ ; ns = not significant.

**Table S3** Factorial analysis of variance. Effect of three factors (season, year and invasion status) on abundance of nematodes within particular nematode trophic groups.

| Factors                     | Degrees of freedom | Sum of squares | Mean squares | F values | Significant |
|-----------------------------|--------------------|----------------|--------------|----------|-------------|
| Factor A (Bacterivores)     | 2                  | 13015.84       | 6507.92      | 0.5771   | -           |
| Factor B                    | 1                  | 57010.83       | 57010.83     | 5.0555   | *           |
| Factor C                    | 1                  | 631999.62      | 63199.62     | 5.6043   | *           |
| A x B                       | 2                  | 24257.85       | 12128.92     | 1.0755   | -           |
| A x C                       | 2                  | 16946.35       | 8473.17      | 0.7514   | -           |
| B x C                       | 1                  | 1004.50        | 1004.50      | 0.0891   | -           |
| A x B x C                   | 2                  | 7432.86        | 3716.43      | 0.3296   | -           |
| Factor A (Fungivores)       | 2                  | 83.258         | 41.629       | 0.0369   | -           |
| Factor B                    | 1                  | 1847.04        | 1847.04      | 1.6358   | -           |
| Factor C                    | 1                  | 1846.83        | 1846.83      | 1.6516   | -           |
| A x B                       | 2                  | 2474.48        | 1373.74      | 1.1267   | -           |
| A x C                       | 2                  | 3424.69        | 1712.34      | 1.5166   | -           |
| B x C                       | 1                  | 2949.80        | 2949.80      | 2.6125   | -           |
| A x B x C                   | 2                  | 301.90         | 150.95       | 0.1337   | -           |
| Factor A (Omnivores)        | 2                  | 9699.47        | 4849.73      | 2.9330   | *           |
| Factor B                    | 1                  | 23510.52       | 23510.52     | 14.2184  | **          |
| Factor C                    | 1                  | 2896.76        | 2896.76      | 1.7519   | -           |
| A x B                       | 2                  | 5578.85        | 2789.42      | 1.6870   | -           |
| A x C                       | 2                  | 1412.336       | 706.16       | 0.4271   | -           |
| B x C                       | 1                  | 6400.46        | 6400.48      | 3.8708   | *           |
| A x B x C                   | 2                  | 2917.00        | 1458.50      | 0.8821   | -           |
| Factor A (Predators)        | 2                  | 1018.933       | 509.46       | 3.0473   | *           |
| Factor B                    | 1                  | 2710.84        | 271.84       | 16.2145  | **          |
| Factor C                    | 1                  | 357.70         | 357.70       | 2.1396   | -           |
| A x B                       | 2                  | 3089.43        | 1544.71      | 9.2395   | **          |
| A x C                       | 2                  | 289.55         | 144.78       | 0.8660   | -           |
| B x C                       | 1                  | 590.94         | 590.94       | 3.5347   | -           |
| A x B x C                   | 2                  | 1022.75        | 511.37       | 3.0587   | -           |
| Factor A (Root-fungal feed) | 2                  | 10305.84       | 5152.92      | 1.2937   | -           |
| Factor B                    | 1                  | 2509.06        | 2509.06      | 0.6299   | -           |
| Factor C                    | 1                  | 44542.85       | 44542.85     | 11.1830  | **          |
| A x B                       | 2                  | 23592.35       | 11796.17     | 2.9616   | -           |
| A x C                       | 2                  | 224.108        | 112.054      | 0.0281   | -           |
| B x C                       | 1                  | 4590.41        | 4950.41      | 1.2428   | -           |
| A x B x C                   | 2                  | 7716.57        | 3858.28      | 0.9687   | -           |
| Factor A (Plant parasites)  | 2                  | 3242.03        | 1621.01      | 2.2007   | -           |
| Factor B                    | 1                  | 1571.84        | 1571.84      | 2.1340   | -           |
| Factor C                    | 1                  | 2732.40        | 2732.40      | 3.7096   | *           |
| A x B                       | 2                  | 1049.45        | 524.27       | 0.7124   | -           |
| A x C                       | 2                  | 303.85         | 151.92       | 0.2063   | -           |
| B x C                       | 1                  | 6931.60        | 6931.60      | 9.4125   | **          |
| A x B x C                   | 2                  | 5015.96        | 2507.98      | 3.4049   | *           |

Factor A (year); Factor B (season); Factor C (invasion status) \*\* F values significant at  $P < 0.01$ ;

\* F values significant at  $P < 0.05$
